# Supplementary material for: Sex differences in associations between multimorbidity and physical function domains among community-dwelling adults in Singapore
Source: PubMed Central journal article supplement (PMC5951575; doi:10.1371/journal.pone.0197443), 2018-05-14
Supplement: pone.0197443.s001.pdf [file pone.0197443.s001.pdf]

**S1 Appendix. 32-item Function Component of the Late-life Function and Disability Instrument (LLFDI)**

| <b>How much difficulty do you have...?<br/>(Remember, this is without the help of someone else<br/>and without the use of any assistive walking device.)</b> |                                                                                               | <b>5) None</b>           | <b>4) A Little</b>       | <b>3) Some</b>           | <b>2) Quite a Lot</b>    | <b>1) Cannot do</b>      |
|--------------------------------------------------------------------------------------------------------------------------------------------------------------|-----------------------------------------------------------------------------------------------|--------------------------|--------------------------|--------------------------|--------------------------|--------------------------|
| 1.                                                                                                                                                           | Unscrewing the lid off a previously unopened jar without using any devices                    | <input type="checkbox"/> | <input type="checkbox"/> | <input type="checkbox"/> | <input type="checkbox"/> | <input type="checkbox"/> |
| 2.                                                                                                                                                           | Going up and down a flight of stairs using a handrail                                         | <input type="checkbox"/> | <input type="checkbox"/> | <input type="checkbox"/> | <input type="checkbox"/> | <input type="checkbox"/> |
| 3.                                                                                                                                                           | Putting on and taking off long pants (including managing fasteners)                           | <input type="checkbox"/> | <input type="checkbox"/> | <input type="checkbox"/> | <input type="checkbox"/> | <input type="checkbox"/> |
| 4.                                                                                                                                                           | Running 800 meters or more                                                                    | <input type="checkbox"/> | <input type="checkbox"/> | <input type="checkbox"/> | <input type="checkbox"/> | <input type="checkbox"/> |
| 5.                                                                                                                                                           | Using common utensils for preparing meals (e.g., can opener, potato peeler, or sharp knife)   | <input type="checkbox"/> | <input type="checkbox"/> | <input type="checkbox"/> | <input type="checkbox"/> | <input type="checkbox"/> |
| 6.                                                                                                                                                           | Holding a full glass of water in one hand                                                     | <input type="checkbox"/> | <input type="checkbox"/> | <input type="checkbox"/> | <input type="checkbox"/> | <input type="checkbox"/> |
| 7.                                                                                                                                                           | Walking 1.6 kilometres, taking rests as necessary                                             | <input type="checkbox"/> | <input type="checkbox"/> | <input type="checkbox"/> | <input type="checkbox"/> | <input type="checkbox"/> |
| 8.                                                                                                                                                           | Going up & down a flight of stairs without using a handrail                                   | <input type="checkbox"/> | <input type="checkbox"/> | <input type="checkbox"/> | <input type="checkbox"/> | <input type="checkbox"/> |
| 9.                                                                                                                                                           | Running a short distance, such as to catch a bus                                              | <input type="checkbox"/> | <input type="checkbox"/> | <input type="checkbox"/> | <input type="checkbox"/> | <input type="checkbox"/> |
| 10.                                                                                                                                                          | Reaching overhead while standing, as if to pull a light cord                                  | <input type="checkbox"/> | <input type="checkbox"/> | <input type="checkbox"/> | <input type="checkbox"/> | <input type="checkbox"/> |
| 11.                                                                                                                                                          | Sitting down in and standing up from a low, soft couch                                        | <input type="checkbox"/> | <input type="checkbox"/> | <input type="checkbox"/> | <input type="checkbox"/> | <input type="checkbox"/> |
| 12.                                                                                                                                                          | Putting on and taking off a coat or jacket                                                    | <input type="checkbox"/> | <input type="checkbox"/> | <input type="checkbox"/> | <input type="checkbox"/> | <input type="checkbox"/> |
| 13.                                                                                                                                                          | Reaching behind your back as if to put a belt through a belt loop                             | <input type="checkbox"/> | <input type="checkbox"/> | <input type="checkbox"/> | <input type="checkbox"/> | <input type="checkbox"/> |
| 14.                                                                                                                                                          | Stepping up and down from a curb                                                              | <input type="checkbox"/> | <input type="checkbox"/> | <input type="checkbox"/> | <input type="checkbox"/> | <input type="checkbox"/> |
| 15.                                                                                                                                                          | Opening a heavy, outside door                                                                 | <input type="checkbox"/> | <input type="checkbox"/> | <input type="checkbox"/> | <input type="checkbox"/> | <input type="checkbox"/> |
| 16.                                                                                                                                                          | Rip open a package of snack food (e.g. cellophane wrapping on crackers) using only your hands | <input type="checkbox"/> | <input type="checkbox"/> | <input type="checkbox"/> | <input type="checkbox"/> | <input type="checkbox"/> |
| 17.                                                                                                                                                          | Pouring from a large pitcher                                                                  | <input type="checkbox"/> | <input type="checkbox"/> | <input type="checkbox"/> | <input type="checkbox"/> | <input type="checkbox"/> |
| 18.                                                                                                                                                          | Getting into and out of a car/taxi (sedan)                                                    | <input type="checkbox"/> | <input type="checkbox"/> | <input type="checkbox"/> | <input type="checkbox"/> | <input type="checkbox"/> |
| 19.                                                                                                                                                          | Hiking a couple of kilometres on uneven surfaces, including hills                             | <input type="checkbox"/> | <input type="checkbox"/> | <input type="checkbox"/> | <input type="checkbox"/> | <input type="checkbox"/> |

**How much difficulty do you have...?  
(Remember, this is without the help of someone else  
and without the use of any assistive walking device.)**

|                                                                                                                                     | <b>5) None</b>           | <b>4) A Little</b>       | <b>3) Some</b>           | <b>2) Quite a Lot</b>    | <b>1) Cannot do</b>      |
|-------------------------------------------------------------------------------------------------------------------------------------|--------------------------|--------------------------|--------------------------|--------------------------|--------------------------|
| 20. Going up and down 3 flights of stairs using a handrail                                                                          | <input type="checkbox"/> | <input type="checkbox"/> | <input type="checkbox"/> | <input type="checkbox"/> | <input type="checkbox"/> |
| 21. Picking up a kitchen chair and moving it, in order to clean                                                                     | <input type="checkbox"/> | <input type="checkbox"/> | <input type="checkbox"/> | <input type="checkbox"/> | <input type="checkbox"/> |
| 22. Using a step stool to reach into a high cabinet                                                                                 | <input type="checkbox"/> | <input type="checkbox"/> | <input type="checkbox"/> | <input type="checkbox"/> | <input type="checkbox"/> |
| 23. Making a bed, including spreading and tucking in bed sheets                                                                     | <input type="checkbox"/> | <input type="checkbox"/> | <input type="checkbox"/> | <input type="checkbox"/> | <input type="checkbox"/> |
| 24. Carrying something in both arms while climbing a flight of stairs (e.g. laundry basket)                                         | <input type="checkbox"/> | <input type="checkbox"/> | <input type="checkbox"/> | <input type="checkbox"/> | <input type="checkbox"/> |
| 25. Bending over from a standing position to pick up a piece of clothing from the floor                                             | <input type="checkbox"/> | <input type="checkbox"/> | <input type="checkbox"/> | <input type="checkbox"/> | <input type="checkbox"/> |
| 26. Walking around one floor of your home, taking into consideration thresholds, doors, furniture, and a variety of floor coverings | <input type="checkbox"/> | <input type="checkbox"/> | <input type="checkbox"/> | <input type="checkbox"/> | <input type="checkbox"/> |
| 27. Getting up from the floor (as if you were laying on the ground)                                                                 | <input type="checkbox"/> | <input type="checkbox"/> | <input type="checkbox"/> | <input type="checkbox"/> | <input type="checkbox"/> |
| 28. Washing dishes, pots, and utensils by hand while standing at sink                                                               | <input type="checkbox"/> | <input type="checkbox"/> | <input type="checkbox"/> | <input type="checkbox"/> | <input type="checkbox"/> |
| 29. Walking several blocks                                                                                                          | <input type="checkbox"/> | <input type="checkbox"/> | <input type="checkbox"/> | <input type="checkbox"/> | <input type="checkbox"/> |
| 30. Taking a 1.6 kilometres, brisk walk without stopping to rest                                                                    | <input type="checkbox"/> | <input type="checkbox"/> | <input type="checkbox"/> | <input type="checkbox"/> | <input type="checkbox"/> |
| 31. Stepping on and off a bus                                                                                                       | <input type="checkbox"/> | <input type="checkbox"/> | <input type="checkbox"/> | <input type="checkbox"/> | <input type="checkbox"/> |
| 32. Walking on a slippery surface outdoors                                                                                          | <input type="checkbox"/> | <input type="checkbox"/> | <input type="checkbox"/> | <input type="checkbox"/> | <input type="checkbox"/> |
