# Supplementary material for: Sex differences in associations between multimorbidity and physical function domains among community-dwelling adults in Singapore
Source: PubMed Central journal article supplement (PMC5951575; doi:10.1371/journal.pone.0197443), 2018-05-14
Supplement: pone.0197443.s002.pdf [file pone.0197443.s002.pdf]

**S2 Appendix. Items used to assess specific physical function domains in the Function Component of the LLFDI.**

| <b>Upper extremity function<br/>(7 items)</b>                                                                                                                                                                                                                                                                                                                                 | <b>Basic lower extremity function<br/>(14 items)</b>                                                                                                                                                                                                                                                                                                                                                                                                                                                                                                                                                                                                                                    | <b>Advanced lower extremity function<br/>(11 items)</b>                                                                                                                                                                                                                                                                                                                                                                                                                                                                                                                                                          |
|-------------------------------------------------------------------------------------------------------------------------------------------------------------------------------------------------------------------------------------------------------------------------------------------------------------------------------------------------------------------------------|-----------------------------------------------------------------------------------------------------------------------------------------------------------------------------------------------------------------------------------------------------------------------------------------------------------------------------------------------------------------------------------------------------------------------------------------------------------------------------------------------------------------------------------------------------------------------------------------------------------------------------------------------------------------------------------------|------------------------------------------------------------------------------------------------------------------------------------------------------------------------------------------------------------------------------------------------------------------------------------------------------------------------------------------------------------------------------------------------------------------------------------------------------------------------------------------------------------------------------------------------------------------------------------------------------------------|
| <ul style="list-style-type: none"> <li>• Unscrewing the lid off a previously unopened jar</li> <li>• Putting on and taking off long pants</li> <li>• Using common utensils for preparing meals</li> <li>• Holding a full glass of water</li> <li>• Reaching behind your back</li> <li>• Ripping open package of snack food</li> <li>• Pouring from a large pitcher</li> </ul> | <ul style="list-style-type: none"> <li>• Going up and down a flight of stairs, using handrail</li> <li>• Reaching overhead while standing</li> <li>• Sitting down in and standing up from low soft couch</li> <li>• Putting on and taking off a coat</li> <li>• Stepping up and down from a curb</li> <li>• Opening a heavy outside door</li> <li>• Getting into and out of a car</li> <li>• Picking up a kitchen chair</li> <li>• Using a step stool</li> <li>• Making a bed</li> <li>• Bending over from a standing position</li> <li>• Walking around one floor of home</li> <li>• Washing dishes, pots, and utensils while standing</li> <li>• Stepping on and off a bus</li> </ul> | <ul style="list-style-type: none"> <li>• Running 1/2 mile or more</li> <li>• Walking 1 mile, taking rests as necessary</li> <li>• Going up &amp; down a flight of stairs, without a handrail</li> <li>• Running a short distance, such as to catch a bus</li> <li>• Hiking a couple of miles</li> <li>• Going up &amp; down 3 flights, with handrail</li> <li>• Carrying something in both arms while climbing stairs</li> <li>• Getting up from the floor</li> <li>• Walking several blocks</li> <li>• Taking a 1 mile brisk walk without stopping</li> <li>• Walking on a slippery surface outdoors</li> </ul> |
